# Supplementary material for: Benchmarking the commitments related to population nutrition and obesity prevention of major food companies in New Zealand
Source: Springer Nature journal article supplement (doi:10.1007/s00038-019-01272-7), 2019-06-22
Supplement: MOESM1 [file 16843924]

**Online Resource A: Domain weightings**

**International Journal of Public Health**

**Benchmarking the commitments related to population nutrition and obesity prevention of major food companies in New Zealand**

**
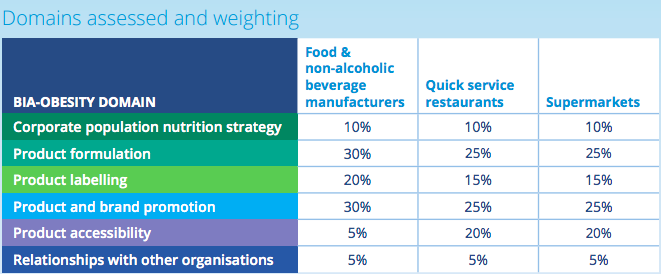
**
